# Supplementary material for: Particle Number Emissions of Gasoline, Compressed Natural Gas (CNG) and Liquefied Petroleum Gas (LPG) Fueled Vehicles at Different Ambient Temperatures
Source: MDPI journal article supplement (doi:10.3390/atmos12070893), 2021-07-09
Supplement: s1 [file s1]

# Supplementary Materials: Addressing Particle Number Emissions of Compressed Natural Gas (CNG) and Liquefied Petroleum Gas (LPG) Fueled Vehicles at Different Ambient Temperatures

Tero Lähde, Barouch Giechaskiel\*

**Table S1.** Solid particle number, SPN4, SPN10 and SPN23, emissions, with and without loss correction, of the three vehicles VLPG, VCNG1 and VCNG2 for 23 °C hot start (HOT), 23 °C cold start (COLD) and sub-zero (SUB) cold start WLTC for gaseous fuel operation. Also excess of SPN4 over SPN10 (sub10–4) and SPN10 over SPN23 (sub23–10) with and without loss correction.

|                  | VLPG, LPG        |                  |         |                  | VCNG1, CNG       |                  |         |                  | VCNG2, CNG       |                  |         |
|------------------|------------------|------------------|---------|------------------|------------------|------------------|---------|------------------|------------------|------------------|---------|
|                  | PN4              | PN10             | PN23    |                  | PN4              | PN10             | PN23    |                  | PN4              | PN10             | PN23    |
| <b>HOT</b>       | 5.2E+10          | 4.8E+10          | 2.4E+10 | <b>HOT</b>       | 2.3E+12          | 1.4E+12          | 1.1E+11 | <b>HOT</b>       | 3.0E+11          | 1.2E+11          | 2.0E+10 |
| <b>COLD</b>      | 2.0E+11          | 1.8E+11          | 1.2E+11 | <b>COLD</b>      | 2.2E+12          | 1.6E+12          | 2.7E+11 | <b>COLD</b>      | 2.4E+11          | 6.7E+10          | 2.0E+10 |
| <b>SUB</b>       | 1.1E+12          | 1.0E+12          | 7.9E+11 | <b>SUB</b>       | 4.3E+12          | 3.5E+12          | 2.7E+12 | <b>SUB</b>       | 3.2E+11          | 1.5E+11          | 3.7E+10 |
|                  | <b>PN4c</b>      | <b>PN10c</b>     |         |                  | <b>PN4c</b>      | <b>PN10c</b>     |         |                  | <b>PN4c</b>      | <b>PN10c</b>     |         |
| <b>HOT</b>       | 1.0E+11          | 6.2E+10          |         | <b>HOT</b>       | 6.3E+12          | 2.2E+12          |         | <b>HOT</b>       | 8.0E+11          | 1.7E+11          |         |
| <b>COLD</b>      | 3.5E+11          | 2.2E+11          |         | <b>COLD</b>      | 5.8E+12          | 2.5E+12          |         | <b>COLD</b>      | 6.5E+11          | 9.5E+10          |         |
| <b>SUB</b>       | 1.7E+12          | 1.1E+12          |         | <b>SUB</b>       | 7.4E+12          | 4.1E+12          |         | <b>SUB</b>       | 8.4E+11          | 2.2E+11          |         |
|                  | <b>sub10–4</b>   | <b>sub23–10</b>  |         |                  | <b>sub10–4</b>   | <b>sub23–10</b>  |         |                  | <b>sub10–4</b>   | <b>sub23–10</b>  |         |
| <b>HOT</b>       | 10               | 101              |         | <b>HOT</b>       | 61               | 1161             |         | <b>HOT</b>       | 158              | 469              |         |
| <b>COLD</b>      | 9                | 56               |         | <b>COLD</b>      | 37               | 516              |         | <b>COLD</b>      | 266              | 240              |         |
| <b>SUB</b>       | 9                | 28               |         | <b>SUB</b>       | 23               | 33               |         | <b>SUB</b>       | 112              | 316              |         |
| <b>corrected</b> | <b>sub10c–4c</b> | <b>sub23–10c</b> |         | <b>corrected</b> | <b>sub10c–4c</b> | <b>sub23–10c</b> |         | <b>corrected</b> | <b>sub10c–4c</b> | <b>sub23–10c</b> |         |
| <b>HOT</b>       | 68               | 162              |         | <b>HOT</b>       | 182              | 1858             |         | <b>HOT</b>       | 362              | 750              |         |
| <b>COLD</b>      | 56               | 90               |         | <b>COLD</b>      | 136              | 826              |         | <b>COLD</b>      | 582              | 384              |         |
| <b>SUB</b>       | 45               | 44               |         | <b>SUB</b>       | 82               | 52               |         | <b>SUB</b>       | 278              | 506              |         |

**Table S2.** Solid particle number, SPN4, SPN10 and SPN23, emissions, with and without loss correction, of the three vehicles VLPG, VCNG1 and VCNG2 for 23 °C hot start (HOT), 23 °C cold start (COLD) and sub-zero (SUB) cold start WLTC for gasoline operation. Also excess of SPN4 over SPN10 (sub10–4) and SPN10 over SPN23 (sub23–10) with and without loss correction.

| VLPG,E10         |                  |                  |         | VCNG1,E10        |                  |                  |         | VCNG2,E5         |                  |                  |         |
|------------------|------------------|------------------|---------|------------------|------------------|------------------|---------|------------------|------------------|------------------|---------|
| E5               | PN4              | PN10             | PN23    |                  | PN4              | PN10             | PN23    |                  | PN4              | PN10             | PN23    |
| HOT              | 5.3E+11          | 4.8E+11          | 2.6E+11 | HOT              | 1.4E+13          | 1.2E+13          | 1.0E+13 | HOT              | 2.9E+11          | 1.4E+11          | 3.0E+10 |
| COLD             | 7.1E+11          | 6.6E+11          | 3.9E+11 | COLD             | 1.5E+13          | 1.3E+13          | 1.1E+13 | COLD             | 8.6E+11          | 3.5E+11          | 5.7E+10 |
| SUB              | 1.8E+12          | 1.7E+12          | 1.2E+12 | SUB              | 2.4E+13          | 2.1E+13          | 1.9E+13 | SUB              | 1.3E+12          | 1.1E+12          | 6.9E+11 |
|                  | <b>PN4C</b>      | <b>PN10c</b>     |         |                  | <b>PN4C</b>      | <b>PN10c</b>     |         |                  | <b>PN4C</b>      | <b>PN10c</b>     |         |
| HOT              | 1.0E+12          | 6.1E+11          |         | HOT              | 2.0E+13          | 1.3E+13          |         | HOT              | 7.5E+11          | 2.0E+11          |         |
| COLD             | 1.3E+12          | 8.2E+11          |         | COLD             | 2.2E+13          | 1.4E+13          |         | COLD             | 2.3E+12          | 5.2E+11          |         |
| SUB              | 3.0E+12          | 1.9E+12          |         | SUB              | 3.3E+13          | 2.2E+13          |         | SUB              | 2.5E+12          | 1.3E+12          |         |
|                  | <b>sub10–4</b>   | <b>sub23–10</b>  |         |                  | <b>sub10–4</b>   | <b>sub23–10</b>  |         |                  | <b>sub10–4</b>   | <b>sub23–10</b>  |         |
| HOT              | 10               | 84               |         | HOT              | 14               | 19               |         | HOT              | 108              | 360              |         |
| COLD             | 8                | 69               |         | COLD             | 15               | 17               |         | COLD             | 148              | 516              |         |
| SUB              | 10               | 40               |         | SUB              | 13               | 12               |         | SUB              | 26               | 54               |         |
| <b>corrected</b> | <b>sub10c–4c</b> | <b>sub23–10c</b> |         | <b>corrected</b> | <b>sub10c–4c</b> | <b>sub23–10c</b> |         | <b>corrected</b> | <b>sub10c–4c</b> | <b>sub23–10c</b> |         |
| HOT              | 65               | 135              |         | HOT              | 52               | 30               |         | HOT              | 270              | 576              |         |
| COLD             | 57               | 111              |         | COLD             | 54               | 27               |         | COLD             | 342              | 825              |         |
| SUB              | 52               | 65               |         | SUB              | 47               | 20               |         | SUB              | 95               | 87               |         |
